# Supplementary material
Source: PubMed Central journal article supplement (PMC6958157)
Supplement: ijcep0011-1637-f3.pdf [file ijcep0011-1637-f3.pdf]

## Variation in MiR-34a is associated with diabetes

**Supplementary Table 1.** Sequences of RT-qPCR primers and SNPs primers

| Gene        | Primer  | Sequence (5'-3')                             |
|-------------|---------|----------------------------------------------|
| hsa-miR-34a | RT      | CTCAACTGGTGTCGTGGAGTCGGCAATTCAGTTGAGACAACCAG |
|             | Forward | ACACTCCAGCTGGGTGGCAGTGTCTTAGC                |
|             | Reverse | CTCAACTGGTGTCGTGGA                           |
| RNU48       | Forward | CTTTATTGAGGTTTGGCTCCAAGCACTG                 |
|             | Reverse | CACCCAGACTAGGATCAACTCCACAGGA                 |
| rs12128240  | Forward | AAGCCCACACAGGCACTTTCTAT                      |
|             | Reverse | GCTTTTGGCTGGGAGAAGTTTG                       |
| rs6577555   | Forward | TGTGATTGCGCCAGTCTG                           |
|             | Reverse | GCTACTTCATTGCTCCCTTT                         |
| rs2666433   | Forward | ATTGCCATCACAGGGTT                            |
|             | Reverse | GCACTACCTTACCTGGAATC                         |

**Supplementary Table 2.** Relevant information of three SNPs in hsa-miR-34a

| SNP (gene)     | Chromosome location | Distance relative to 5' pre-miR-34a | MAF IN CHB | Transcription factor before mutation | Transcription factor after mutation |
|----------------|---------------------|-------------------------------------|------------|--------------------------------------|-------------------------------------|
| Rs12128240 C>T | Chr1:9151244        | +532                                | 0.128      | NO                                   | AR, RREB1, RUNX2, RFX5              |
| Rs6577555 A>C  | Chr1:9152228        | -450                                | 0.376      | ZNF263, RFX2, SRY                    | NO                                  |
| Rs2666433 A>G  | Chr1:9153118        | -1340                               | 0.267      | RUNX2, BRCA1                         | THAP1, YY1                          |

## Variation in MiR-34a is associated with diabetes

**Supplementary Table 3.** Characteristics of human miRNA expression profiling studies (T2DM vs. non-diabetic controls)

| Author                                              | Year | Sample          |                           |                                                                                                            | Differently expressed miRNAs                                                                                                                                                                                                                                                                                                                                                                                                                                                                                                                                                                                                                                                                                                                                                                                            |
|-----------------------------------------------------|------|-----------------|---------------------------|------------------------------------------------------------------------------------------------------------|-------------------------------------------------------------------------------------------------------------------------------------------------------------------------------------------------------------------------------------------------------------------------------------------------------------------------------------------------------------------------------------------------------------------------------------------------------------------------------------------------------------------------------------------------------------------------------------------------------------------------------------------------------------------------------------------------------------------------------------------------------------------------------------------------------------------------|
|                                                     |      | Country         | Tissue                    | Type: NO.                                                                                                  |                                                                                                                                                                                                                                                                                                                                                                                                                                                                                                                                                                                                                                                                                                                                                                                                                         |
| Xiao Wang (Wang X, et al. 2014)                     | 2014 | Sweden, Iraq    | Plasma                    | T2DM/Normal+IFG/IGT: 33/119                                                                                | Up: miR-15a, miR-21, miR-24, miR-29b, miR-126, miR-144, miR-150, miR-320a, miR-486-5p                                                                                                                                                                                                                                                                                                                                                                                                                                                                                                                                                                                                                                                                                                                                   |
| Gaia Spinetti (Spinetti G, et al. 2013)             | 2013 | NR              | Serum and PACs from PBMCs | T2DM+CLI/nondiabetic: 99 (101)/18<br>T2DM/nondiabetic: 6/5<br>T2DM+CLI/CLI: 6/6<br>T2DM/nondiabetic: 52/17 | Up: miR-15a, miR-15b, miR-16, miR-17, miR-18a, miR-19a, miR-19b, miR-20a, miR-23a, miR-24, miR-27b, miR-103, miR-107, miR-126, miR-132, miR-195, miR-221<br>Down: miR-222, miR-497                                                                                                                                                                                                                                                                                                                                                                                                                                                                                                                                                                                                                                      |
| Anna Zampetaki (Zampetaki A, et al. 2012)           | 2010 | Bolzano, Italy  | Plasma                    | T2DM/nondiabetic: 80/80                                                                                    | Up: miR-28-3p<br>Down: miR-24, miR-21, miR-20b, miR-15a, miR-126, miR-191, miR-197, miR-223, miR-320, miR-486, miR-150                                                                                                                                                                                                                                                                                                                                                                                                                                                                                                                                                                                                                                                                                                  |
| Zhang (Zhang T, et al. 2013)                        | 2013 | Shenzhen, China | Plasma                    | T2DM/nondiabetic: 30/30                                                                                    | Down: miR-126                                                                                                                                                                                                                                                                                                                                                                                                                                                                                                                                                                                                                                                                                                                                                                                                           |
| Balasubramanyam (Balasubramanyam M, et al. 2011)    | 2011 | Chennai, India  | PBMCs                     | T2DM/nondiabetic: 20/20                                                                                    | Down: miR-146                                                                                                                                                                                                                                                                                                                                                                                                                                                                                                                                                                                                                                                                                                                                                                                                           |
| Corral-Fernández (Corral-Fernández NE, et al. 2013) | 2013 | Mexico          | PBMCs                     | T2DM/nondiabetic: 20/20                                                                                    | Down: miR-155, miR-146a                                                                                                                                                                                                                                                                                                                                                                                                                                                                                                                                                                                                                                                                                                                                                                                                 |
| Karolina (Karolina DS, et al. 2011)                 | 2011 | Singapore       | Whole blood               | T2DM/nondiabetic: 8/7                                                                                      | Up: miR-106b, miR-125a-5p, miR-125b, miR-126, miR-1285, miR-1301, miR-130a, miR-130b, miR-142-3p, miR-144, miR-150, miR-151-3p, miR-151-5p, miR-15a, miR-17, miR-183, miR-185, miR-190, miR-192, miR-193a-3p, miR-194, miR-221, miR-222, miR-23a, miR-23b, miR-26a, miR-26b, miR-27a, miR-299-3p, miR-29a, miR-29b, miR-29c, miR-320a, miR-320b, miR-320c, miR-320d, miR-335, miR-361-3p, miR-375, miR-502-3p, miR-550, miR-589, miR-620, miR-629, miR-665, miR-886-5p, miR-99b<br>Down: let-7b, let-7d, let-7e, let-7g, let-7i, miR-106a, miR-1184, miR-129-5p, miR-1297, miR-146a, miR-146b-5p, miR-17, miR-182, miR-185, miR-186, miR-19a, miR-20a, miR-20b, miR-30c, miR-30d, miR-30e, miR-340, miR-342-3p, miR-34b, miR-362-5p, miR-374b, miR-519e, miR-532-3p, miR-636, miR-637, miR-652, miR-660, miR-7, miR-923 |
| Karolina (Karolina DS, et al. 2012)                 | 2012 | Singapore       | Whole blood               | T2DM/nondiabetic: 50/46                                                                                    | Up: miR-130a, miR-150, miR-192, miR-27a, miR-320a<br>Down: miR-17, miR-197, miR-509-5p, miR-652, miR-195, miR-92a                                                                                                                                                                                                                                                                                                                                                                                                                                                                                                                                                                                                                                                                                                       |
| Kong (Kong L, et al. 2010)                          | 2010 | Shandong, China | Serum                     | T2DM/nondiabetic: 18/26                                                                                    | Up: miR-34a                                                                                                                                                                                                                                                                                                                                                                                                                                                                                                                                                                                                                                                                                                                                                                                                             |
| Kong (Kong L, et al. 2011)                          | 2011 | Shandong, China | Serum                     | T2DM/nondiabetic: 18/19                                                                                    | Up: miR-9, miR-29a, miR-30d, miR-34a, miR-124a, miR-146a, miR-375                                                                                                                                                                                                                                                                                                                                                                                                                                                                                                                                                                                                                                                                                                                                                       |
| Meng (Meng S et al. 2012)                           | 2012 | Shanghai, China | PBMCs                     | T2DM/nondiabetic: 15/15                                                                                    | Down: miR-21, miR-27a, miR-27b, miR-126, miR-130                                                                                                                                                                                                                                                                                                                                                                                                                                                                                                                                                                                                                                                                                                                                                                        |
| Ortega (Ortega FJ, et al. 2014)                     | 2014 | Girona, Spain   | Plasma                    | T2DM/nondiabetic: 30/35<br>T2DM+obese/obese: 18/10                                                         | Up: miR-140-5p, miR-142-3p, miR-222<br>Down: miR-125b, miR-130b, miR-126a                                                                                                                                                                                                                                                                                                                                                                                                                                                                                                                                                                                                                                                                                                                                               |
| Pescador (Pescador N, et al. 2013)                  | 2013 | Madrid, Spain   | Serum                     | T2DM: 13<br>Nondiabetic: 20<br>Obese: 20<br>T2DM+obese: 16                                                 | Up: miR-15b<br>Down: miR-138, miR-376a, miR-503                                                                                                                                                                                                                                                                                                                                                                                                                                                                                                                                                                                                                                                                                                                                                                         |
| Rong (Rong Y, et al. 2013)                          | 2013 | Hubei, China    | Plasma                    | T2DM/nondiabetic: 90/90                                                                                    | Up: miR-146                                                                                                                                                                                                                                                                                                                                                                                                                                                                                                                                                                                                                                                                                                                                                                                                             |
| Xavier DJ (Xavier DJ, et al. 2015)                  | 2015 | Brazil          | PBMCs                     | T2DM/nondiabetic: 9/9                                                                                      | Up: miR-101, miR-10a, miR-1260, miR-142-5p, miR-146b-5p, miR-186, miR-222, miR-29b, miR-302b, miR-30e, miR-32, miR-339-3p, miR-424<br>Down: miR-107, miR-148b, miR-151-5p, miR-224, miR-23b                                                                                                                                                                                                                                                                                                                                                                                                                                                                                                                                                                                                                             |
| Santovito D (Santovito D, et al. 2014)              | 2014 | NR              | Plasma and Serum          | T2DM/nondiabetic: 18/12                                                                                    | Up: miR-326, miR-532, miR-186, miR-127-3p<br>Down: let-7g, let-7d, miR-126, miR-101, miR-18b, miR-199a-3p, miR-21, miR-502-3p, miR-495, miR-132, miR-15b, miR-200c, miR-223-5p, miR-16, miR-543, miR-195, let-7a, miR-26b, miR-374a, miR-26a, let-7f                                                                                                                                                                                                                                                                                                                                                                                                                                                                                                                                                                    |
